# Supplementary material for: Synthesis of Disaccharides Containing 6-Deoxy-α-L-talose as Potential Heparan Sulfate Mimetics
Source: PubMed Central journal article supplement (PMC6268951; doi:10.3390/molecules17089790), 2012-08-15

## Supplementary Data

### **Synthesis of Disaccharides Containing 6-deoxy- $\alpha$ -L-Talose as Potential Heparan Sulfate Mimetics**

**Jon K. Fairweather**<sup>1</sup>, **Ligong Liu**<sup>1,2</sup>, **Tomislav Karoli**<sup>1,2</sup> and **Vito Ferro**<sup>1,3\*</sup>

<sup>1</sup> Drug Design Group, Progen Pharmaceuticals Ltd, Brisbane QLD 4076, Australia

<sup>2</sup> Current address: The University of Queensland, Institute for Molecular Bioscience, Brisbane, QLD 4072, Australia

<sup>3</sup> Current address: The University of Queensland, School of Chemistry and Molecular Biosciences, Brisbane, QLD 4072, Australia

\* Author to whom correspondence should be addressed; E-Mail: [v.ferro@uq.edu.au](mailto:v.ferro@uq.edu.au); Tel.: +61-7-3346-9598; Fax: +61-7-3365-4299.

## Contents

|                                                               |     |
|---------------------------------------------------------------|-----|
| <sup>1</sup> H NMR (400 MHz) spectrum for compound <b>12</b>  | S3  |
| <sup>1</sup> H NMR (400 MHz) spectrum for compound <b>20</b>  | S4  |
| <sup>13</sup> C NMR (100 MHz) spectrum for compound <b>20</b> | S5  |
| <sup>1</sup> H NMR (400 MHz) spectrum for compound <b>14</b>  | S6  |
| <sup>1</sup> H NMR (400 MHz) spectrum for compound <b>22</b>  | S7  |
| <sup>13</sup> C NMR (100 MHz) spectrum for compound <b>22</b> | S8  |
| <sup>1</sup> H NMR (200 MHz) spectrum for compound <b>23</b>  | S9  |
| <sup>1</sup> H NMR (400 MHz) spectrum for compound <b>25</b>  | S10 |
| <sup>1</sup> H NMR (400 MHz) spectrum for compound <b>27</b>  | S11 |
| <sup>1</sup> H NMR (400 MHz) spectrum for compound <b>26</b>  | S12 |
| <sup>1</sup> H NMR (400 MHz) spectrum for compound <b>30</b>  | S13 |
| <sup>13</sup> C NMR (100 MHz) spectrum for compound <b>30</b> | S14 |
| <sup>1</sup> H NMR (400 MHz) spectrum for compound <b>31</b>  | S15 |
| <sup>1</sup> H NMR (400 MHz) spectrum for compound <b>32</b>  | S16 |

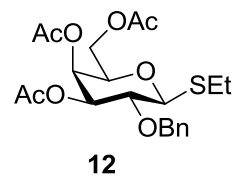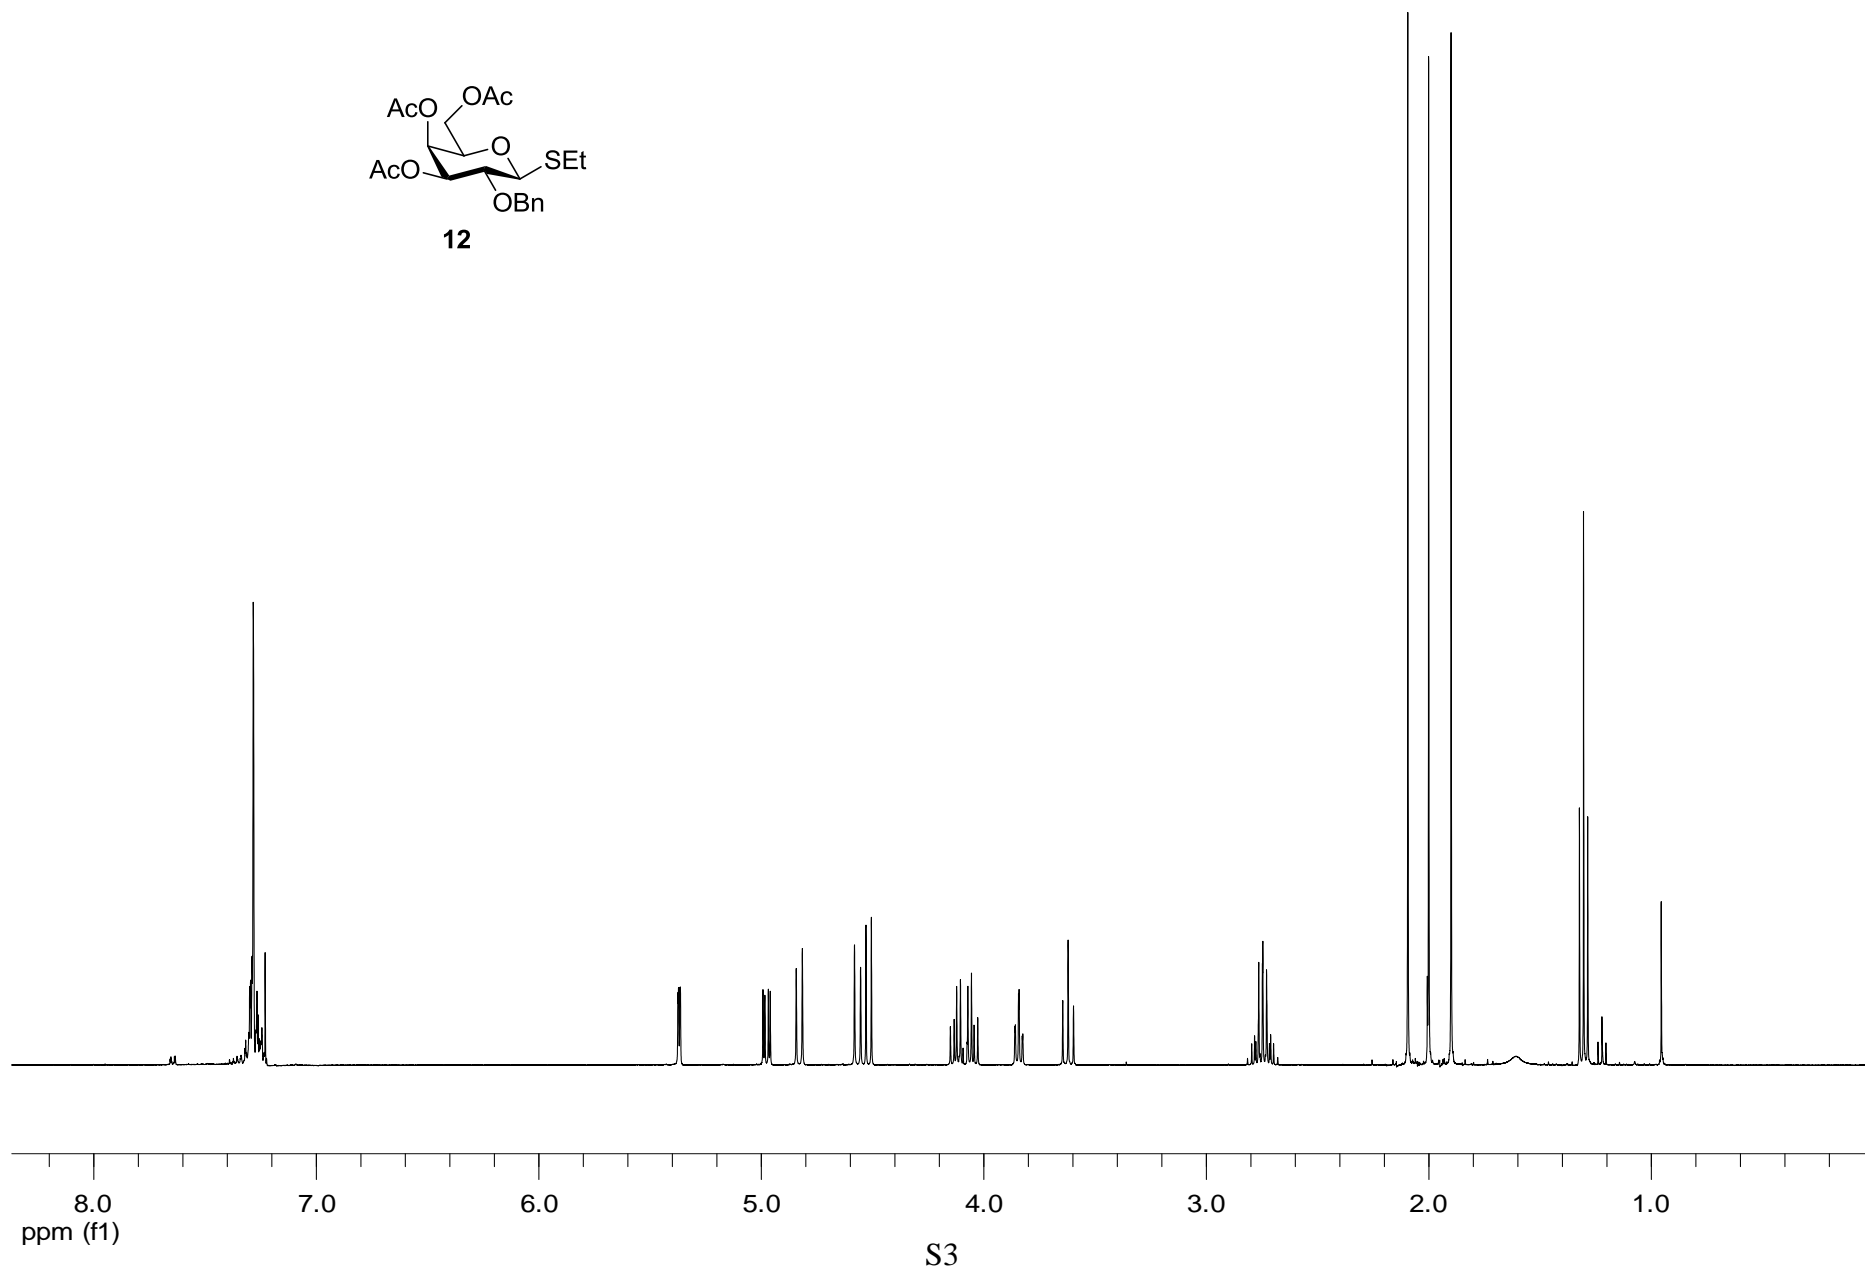

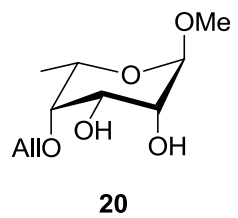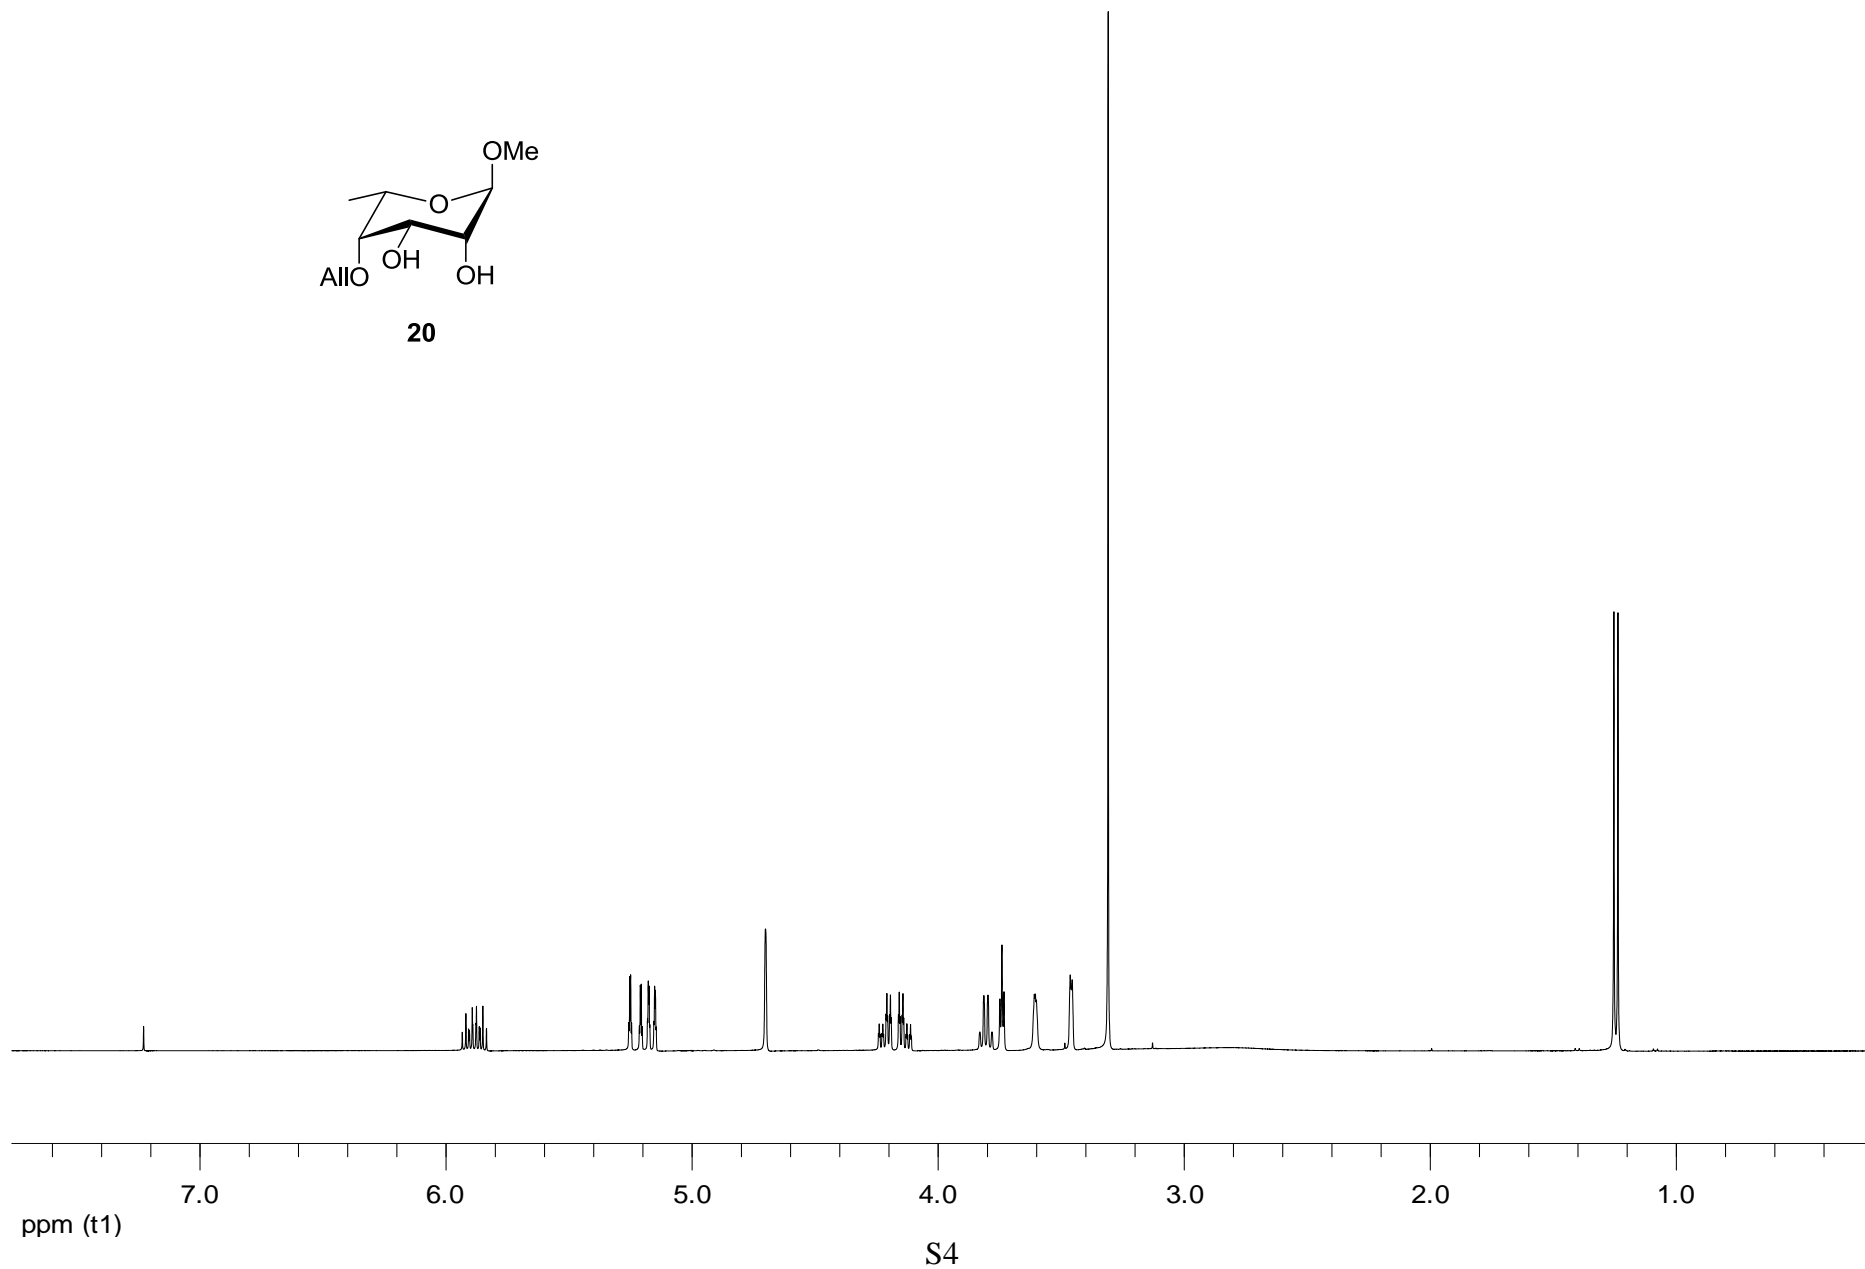

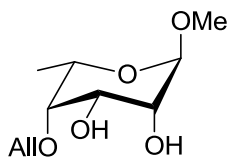

20

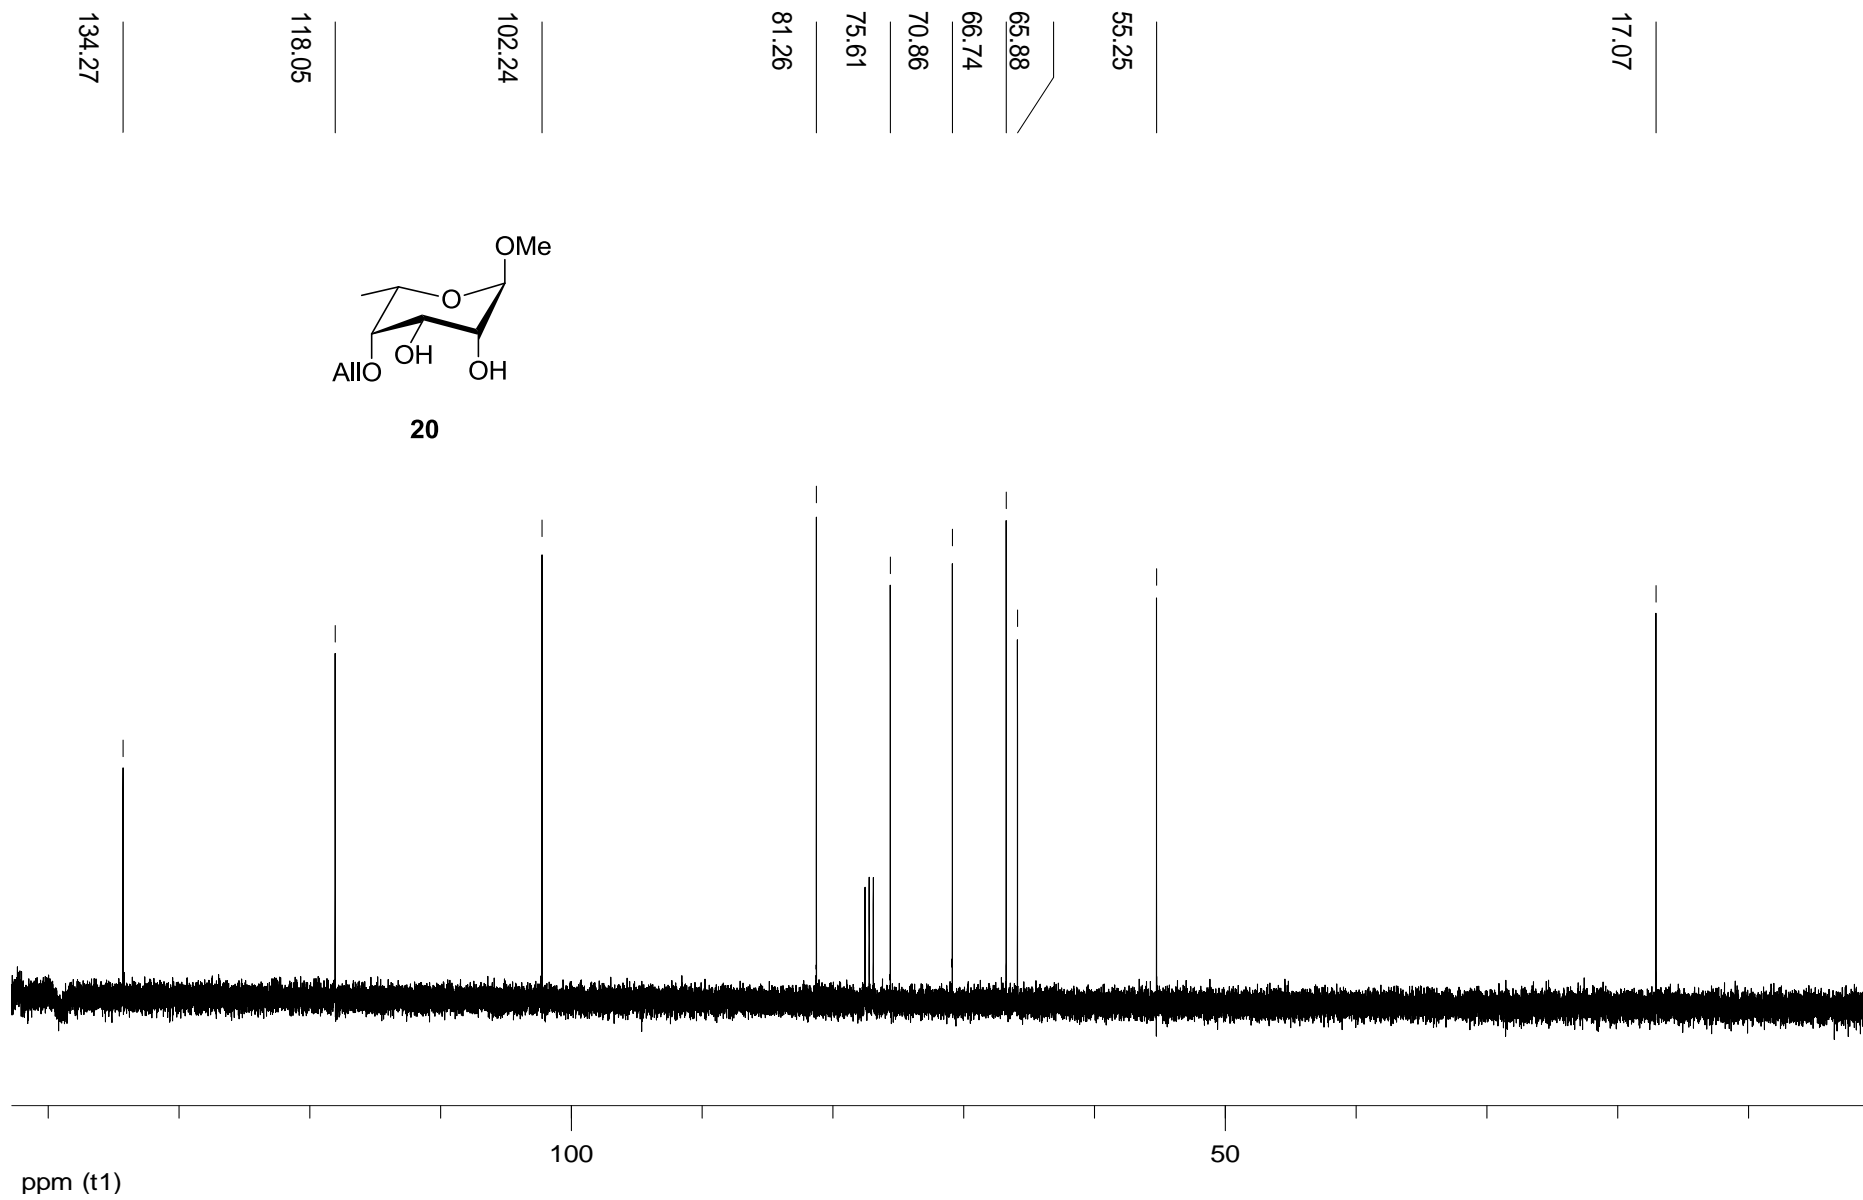

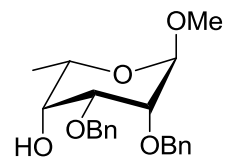

14

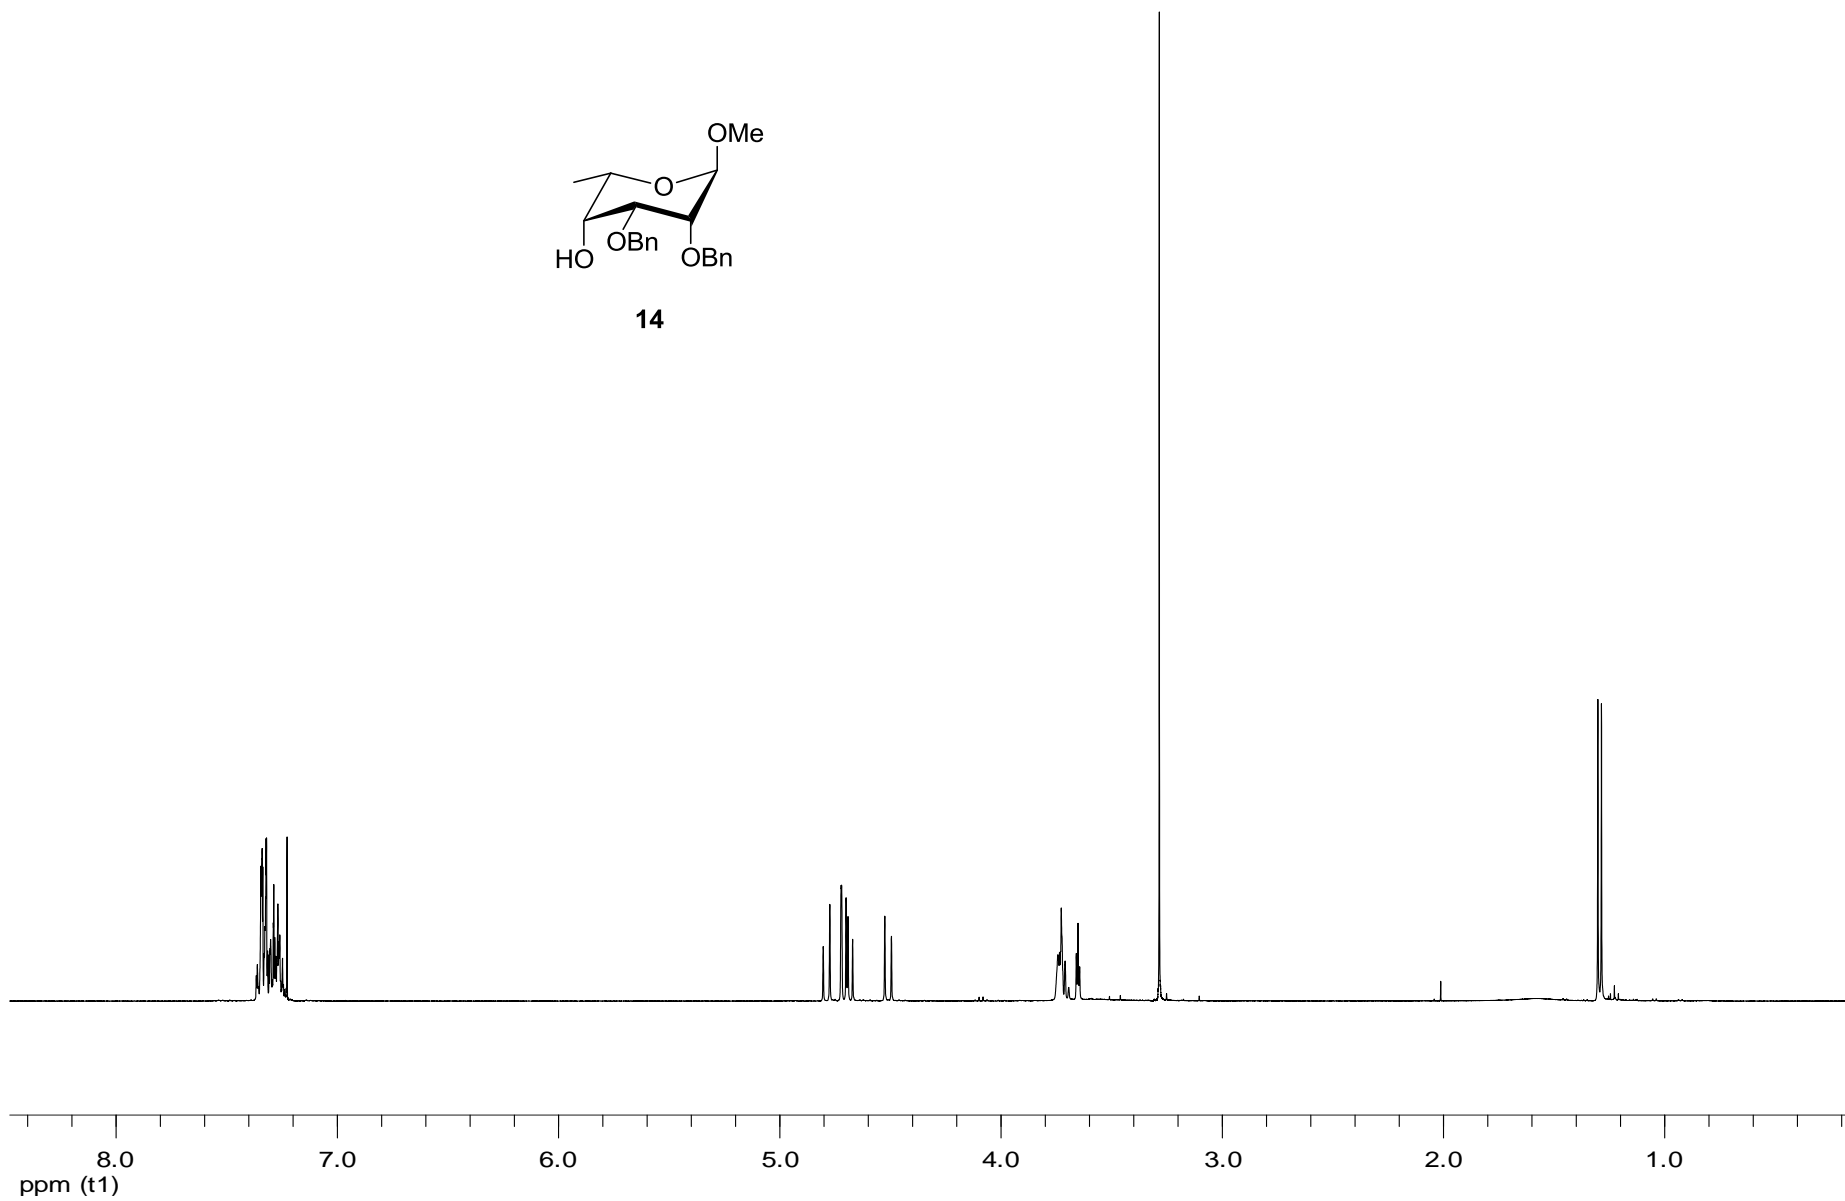

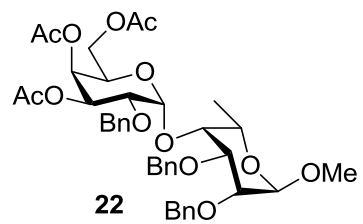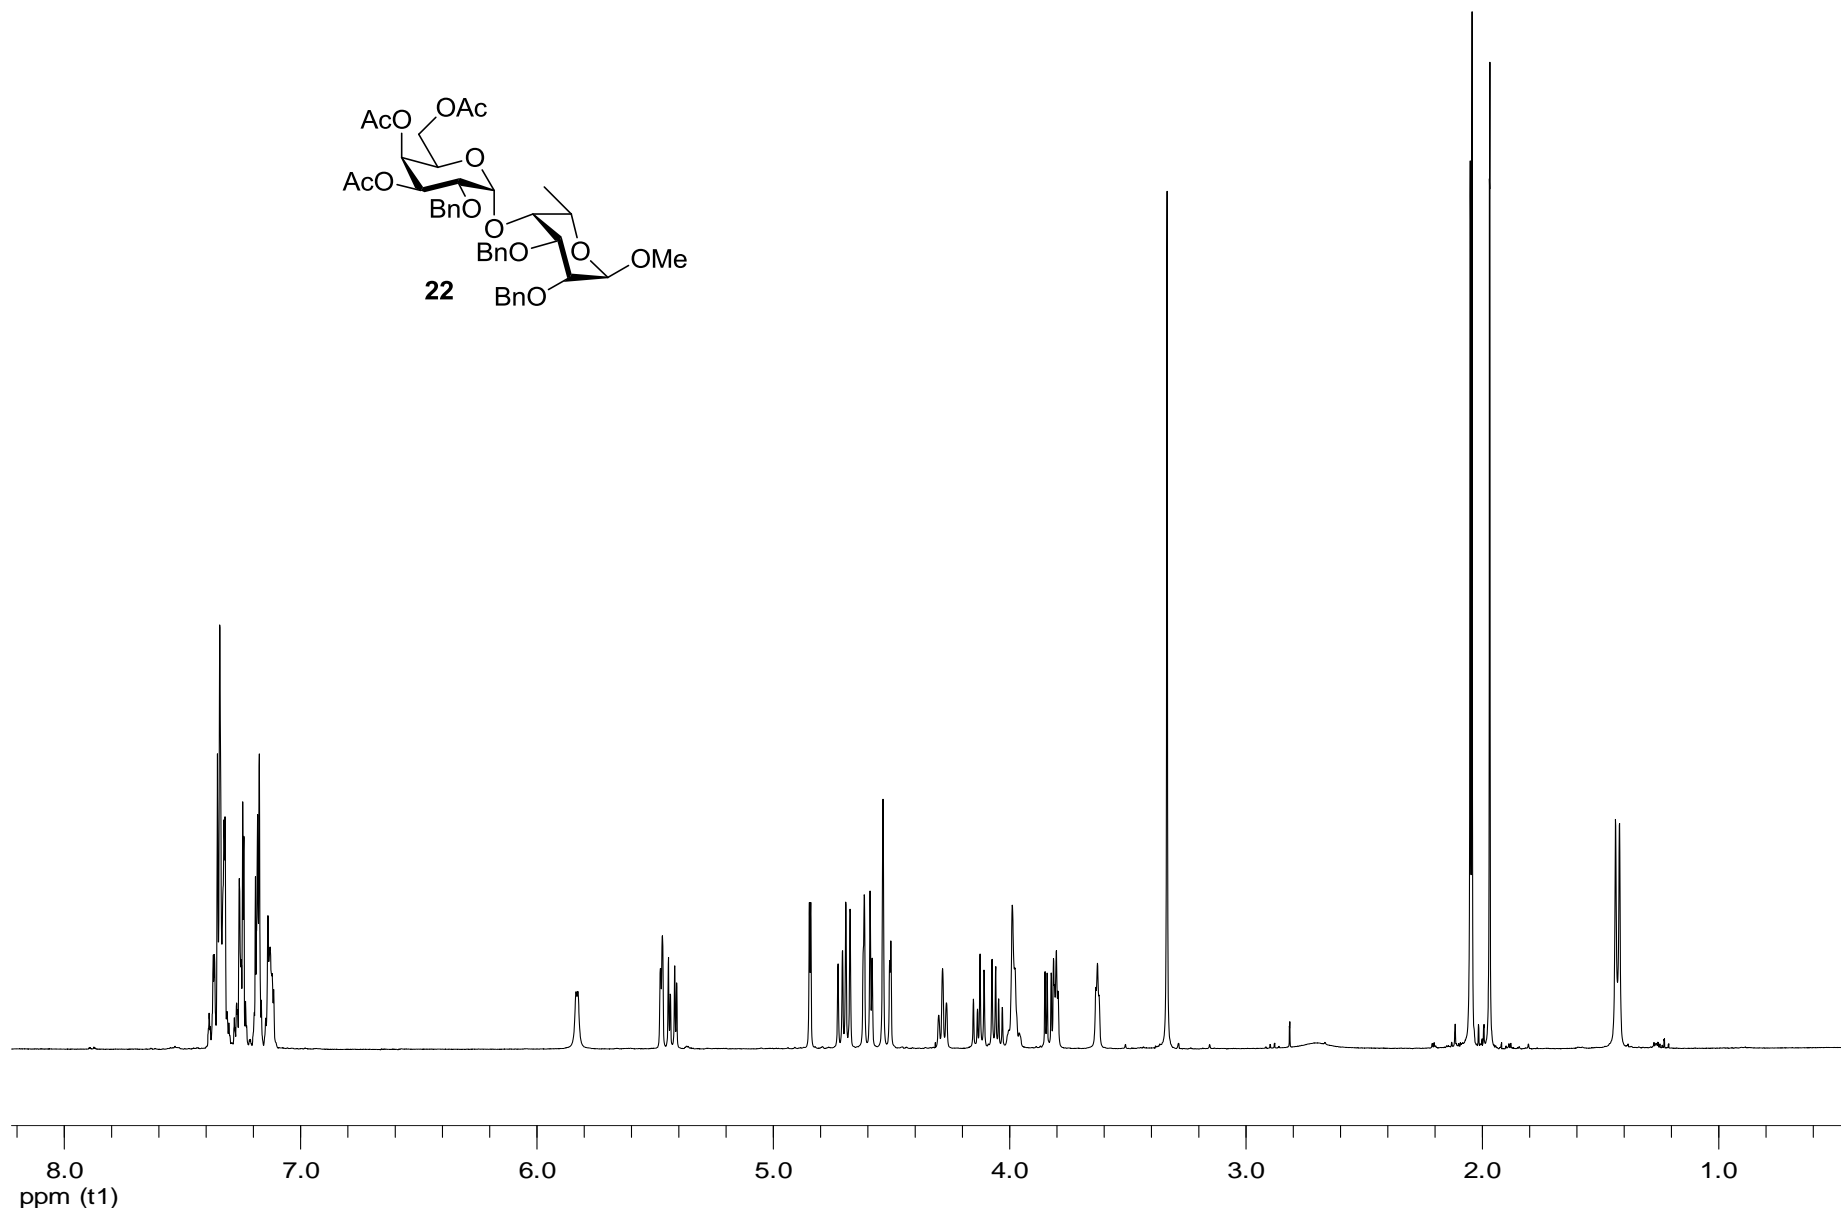

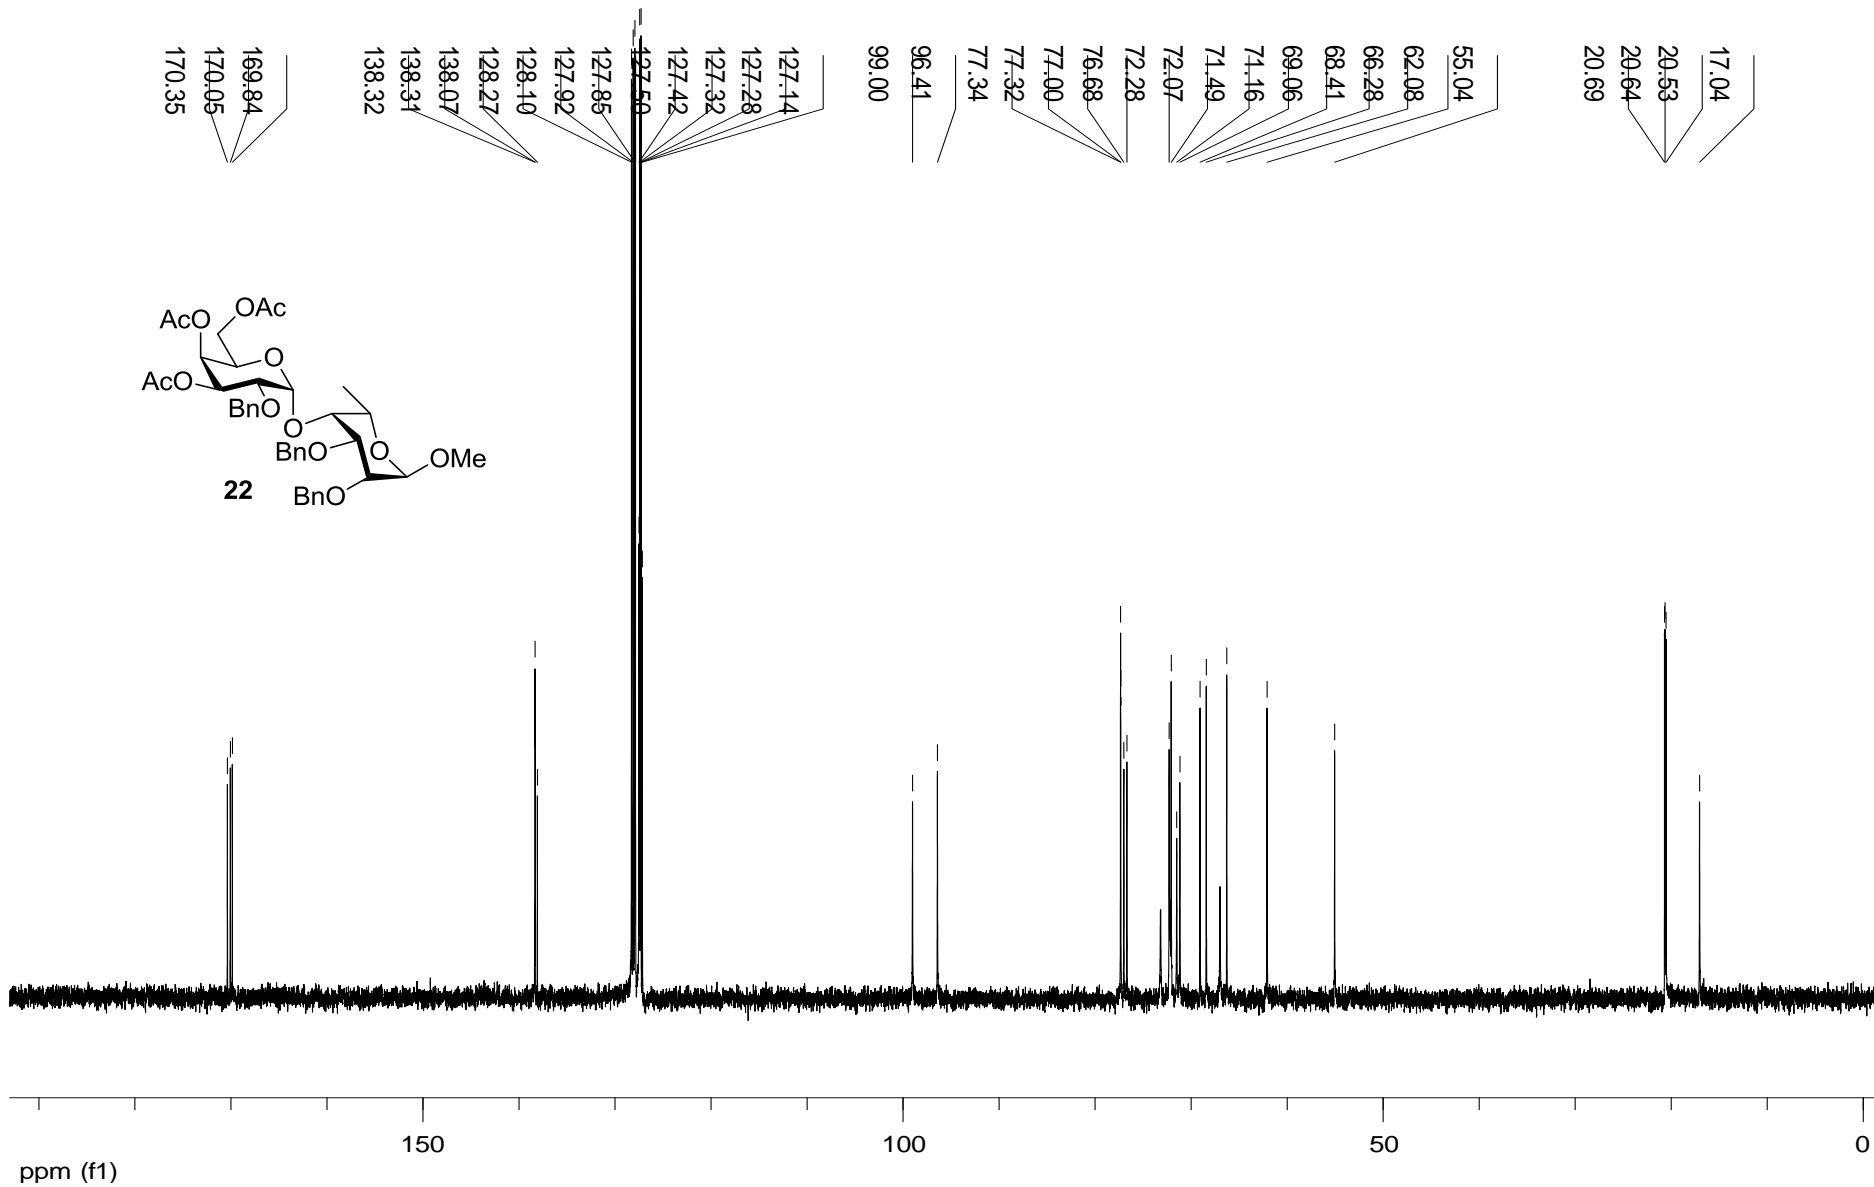



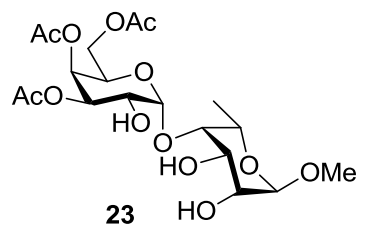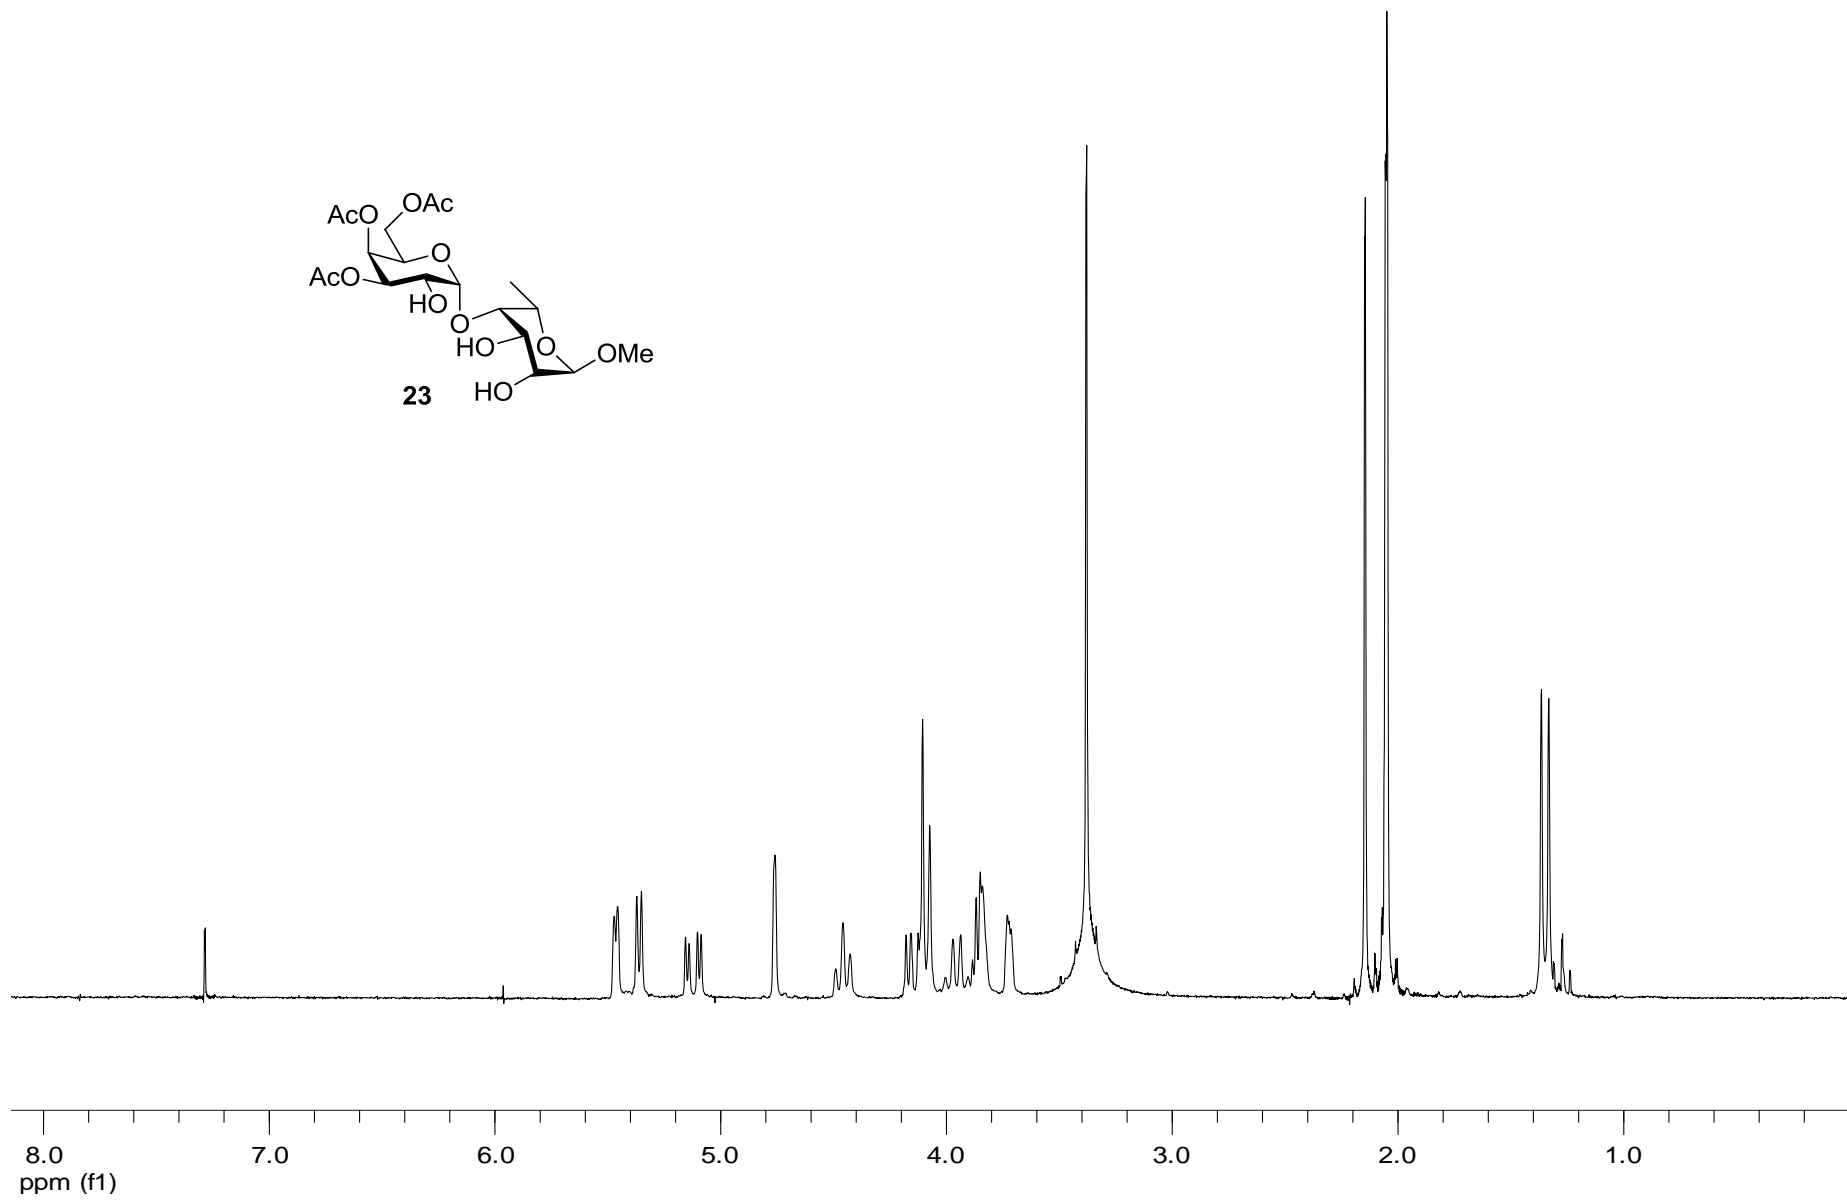

S9

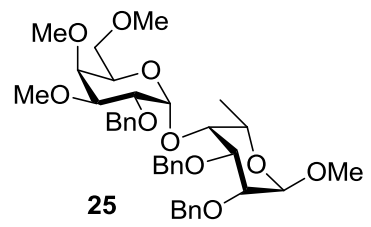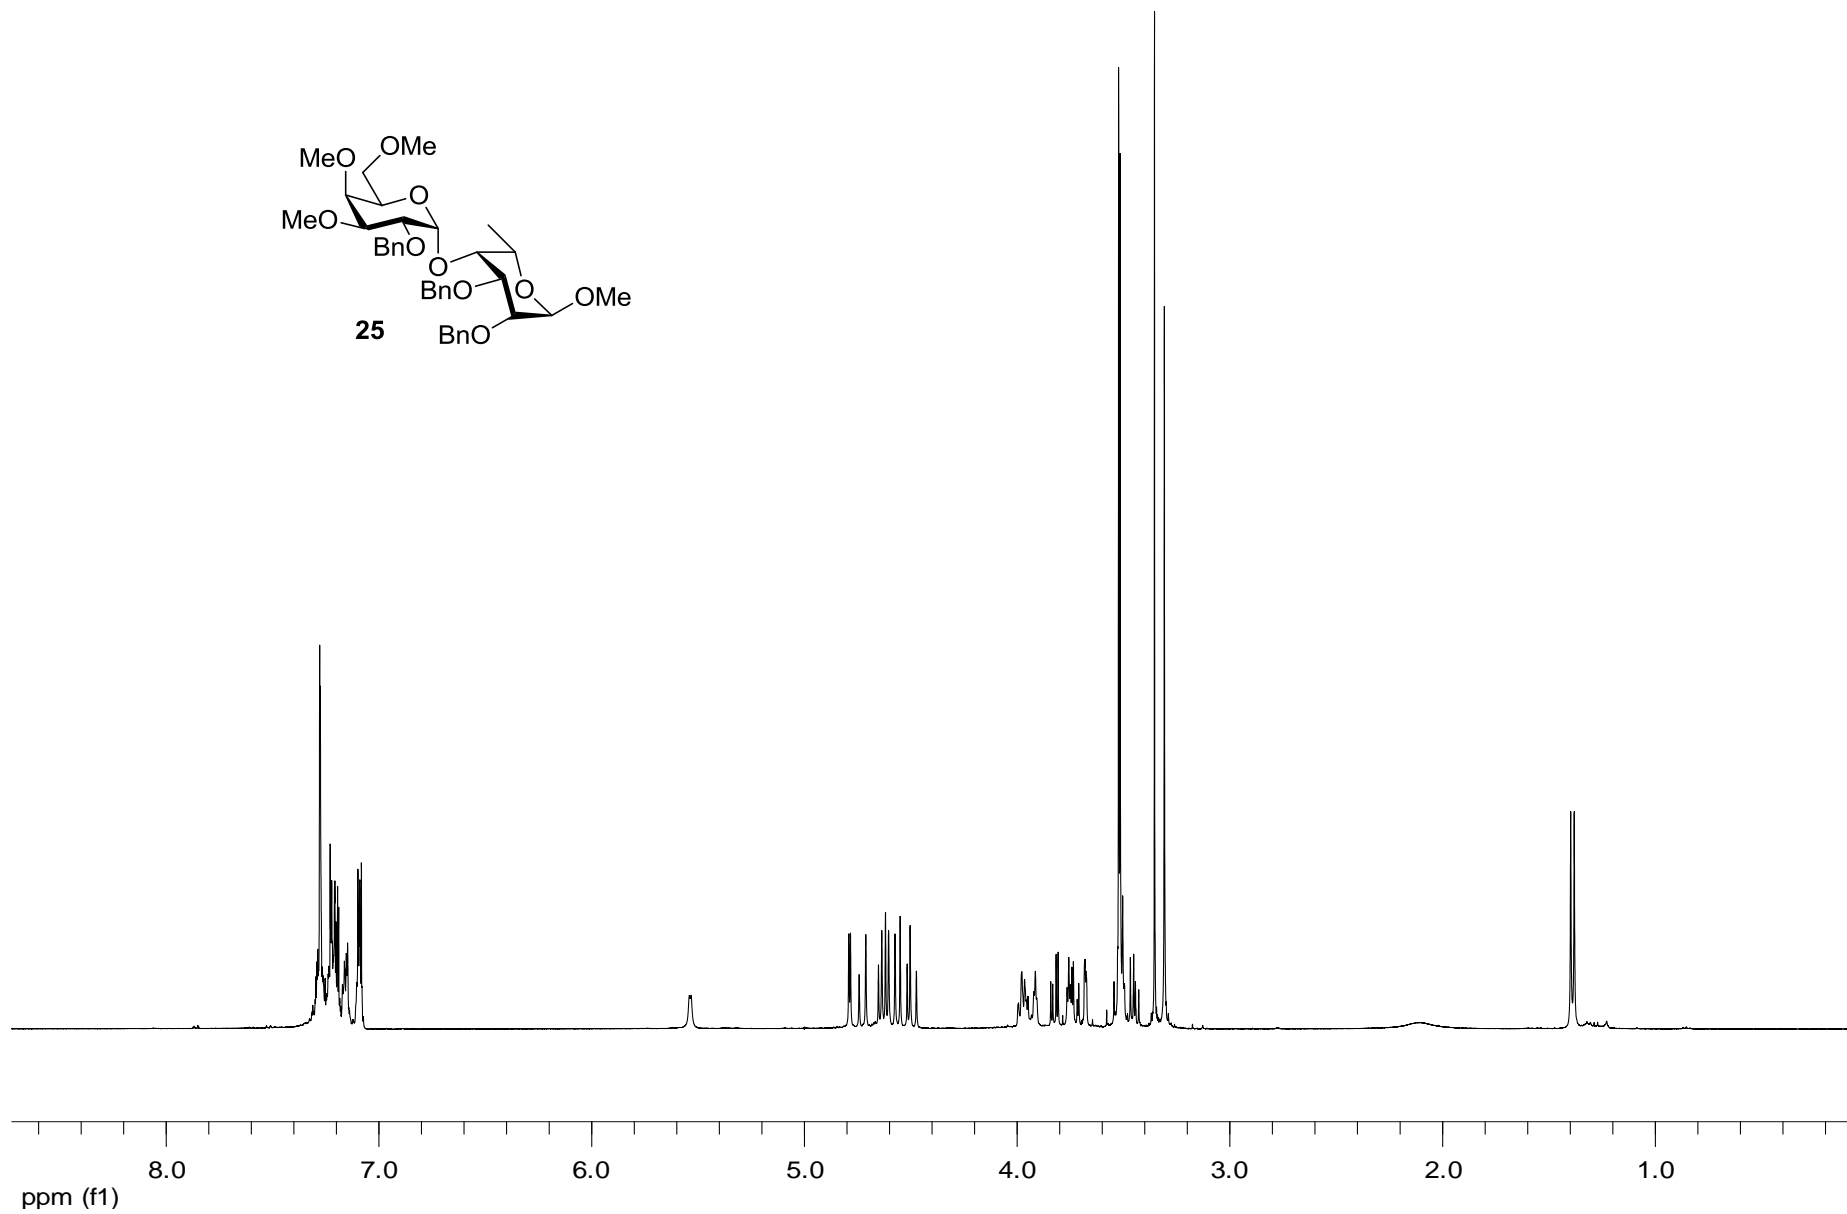

S10

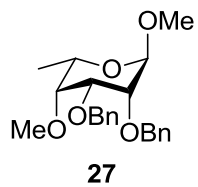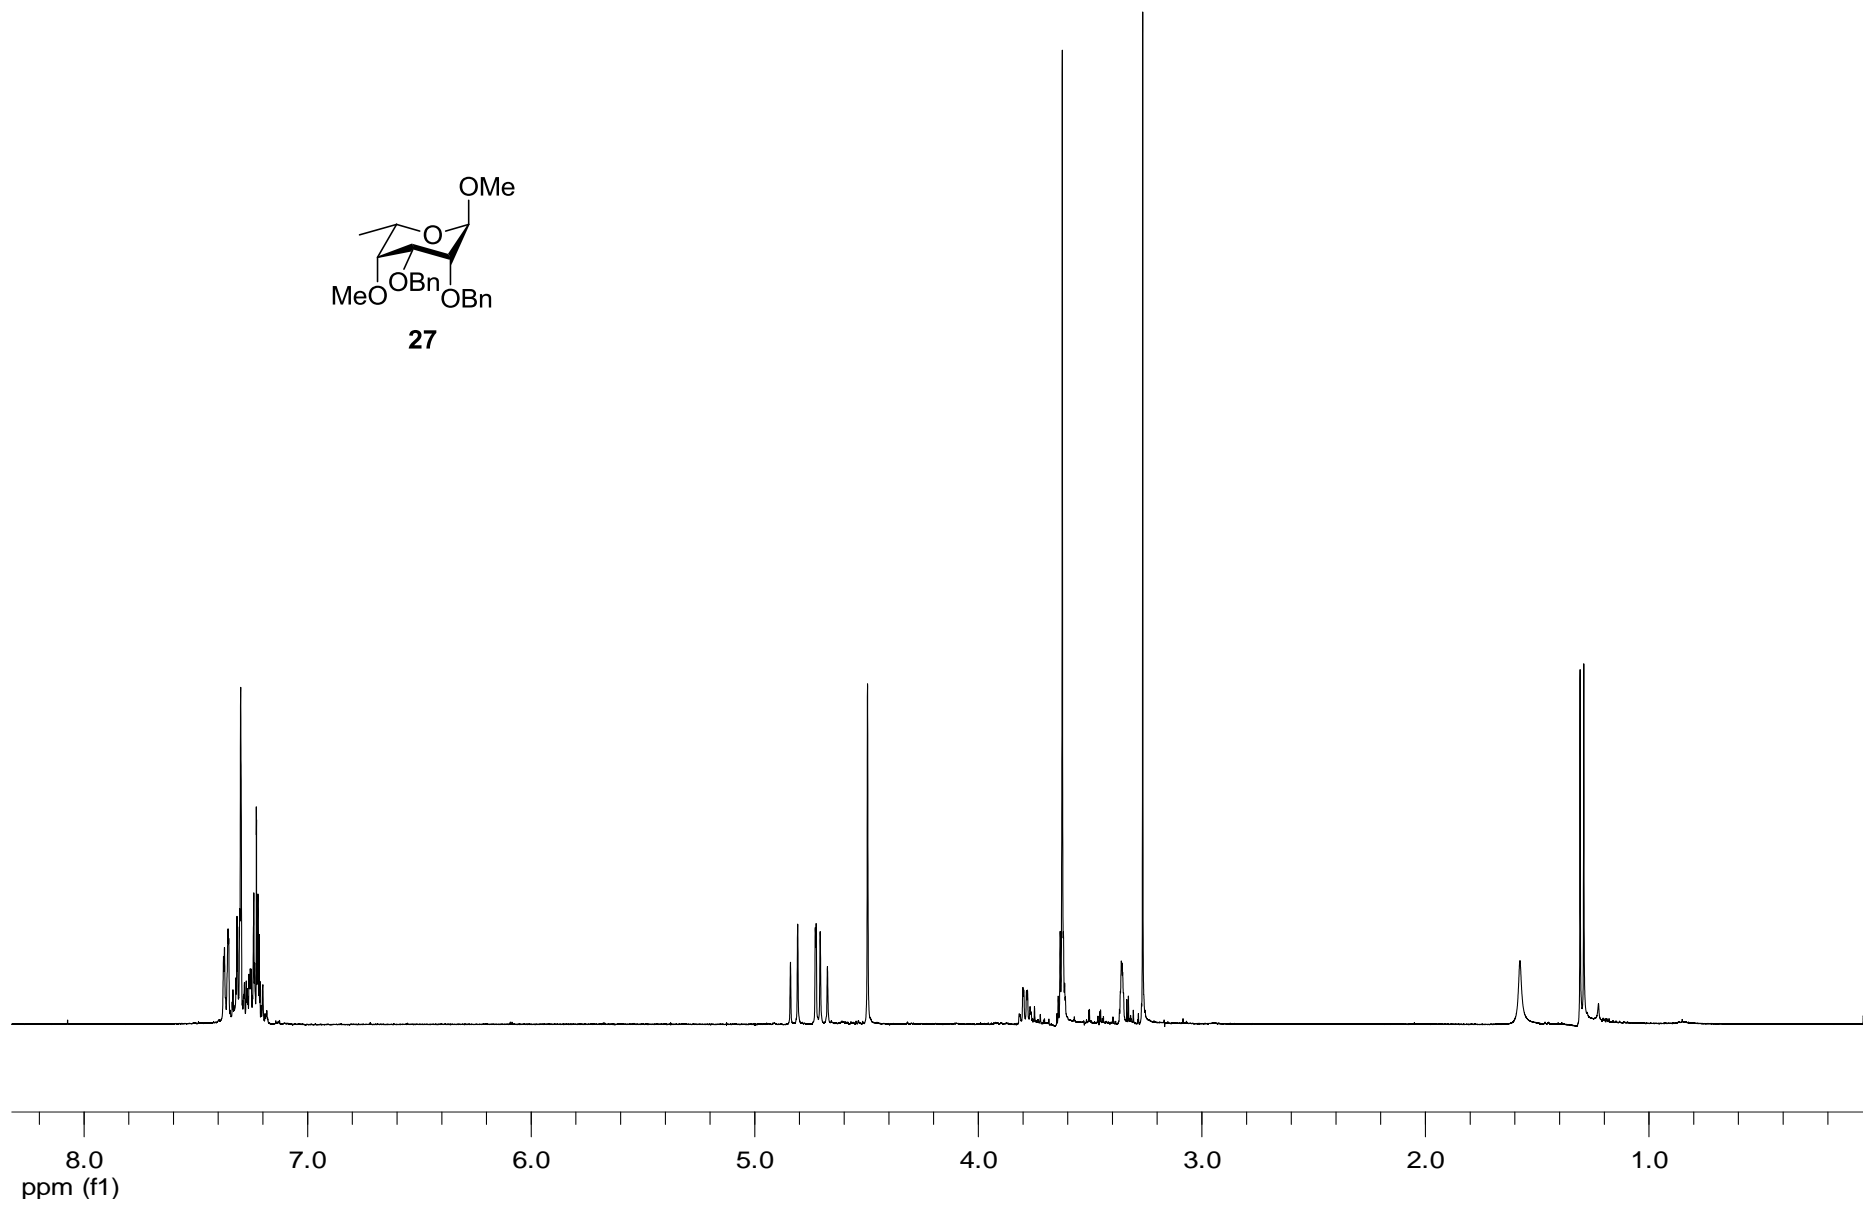

S11

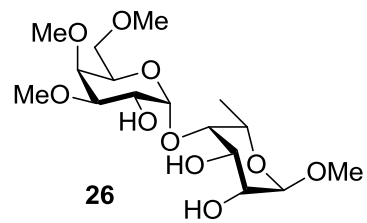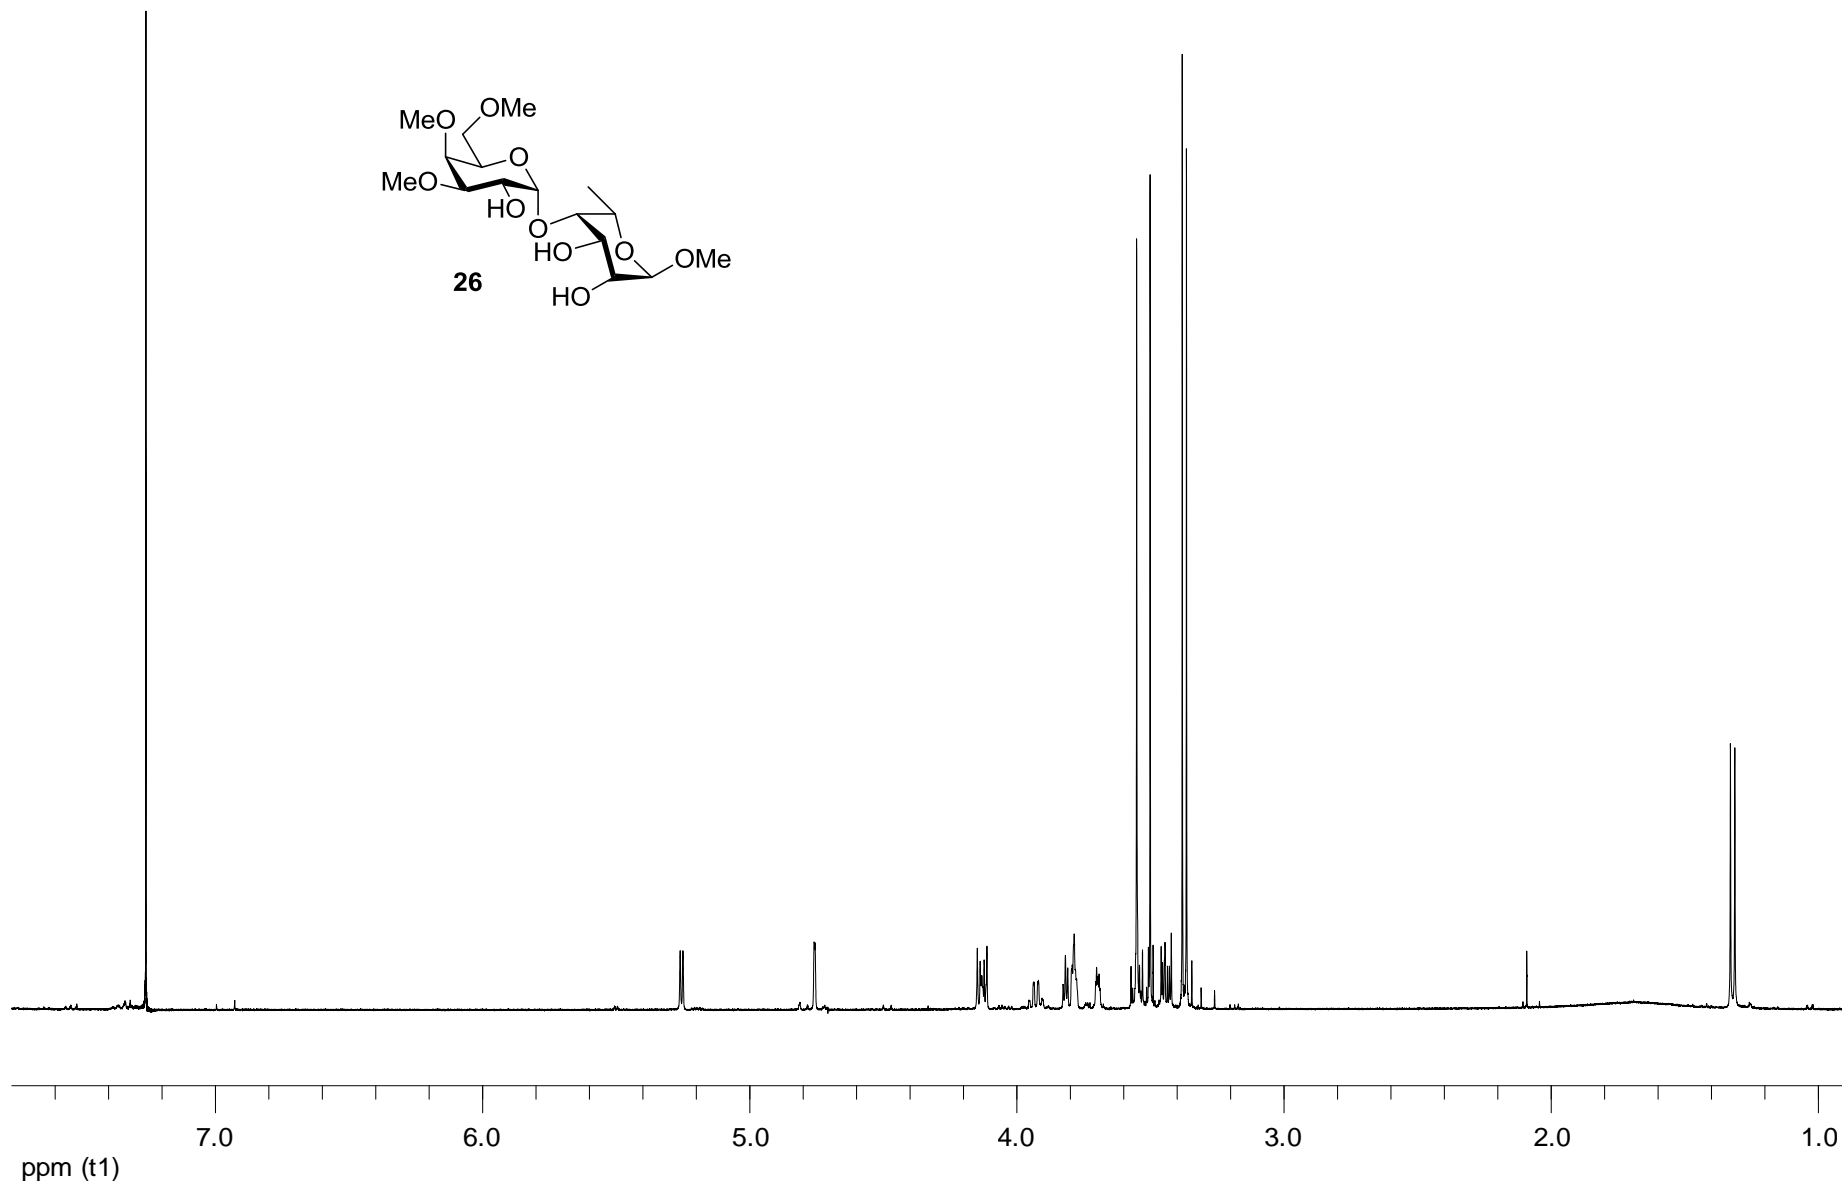

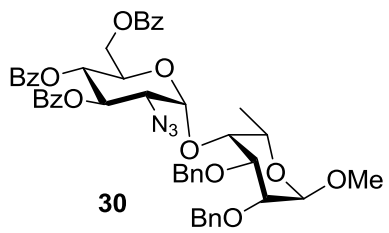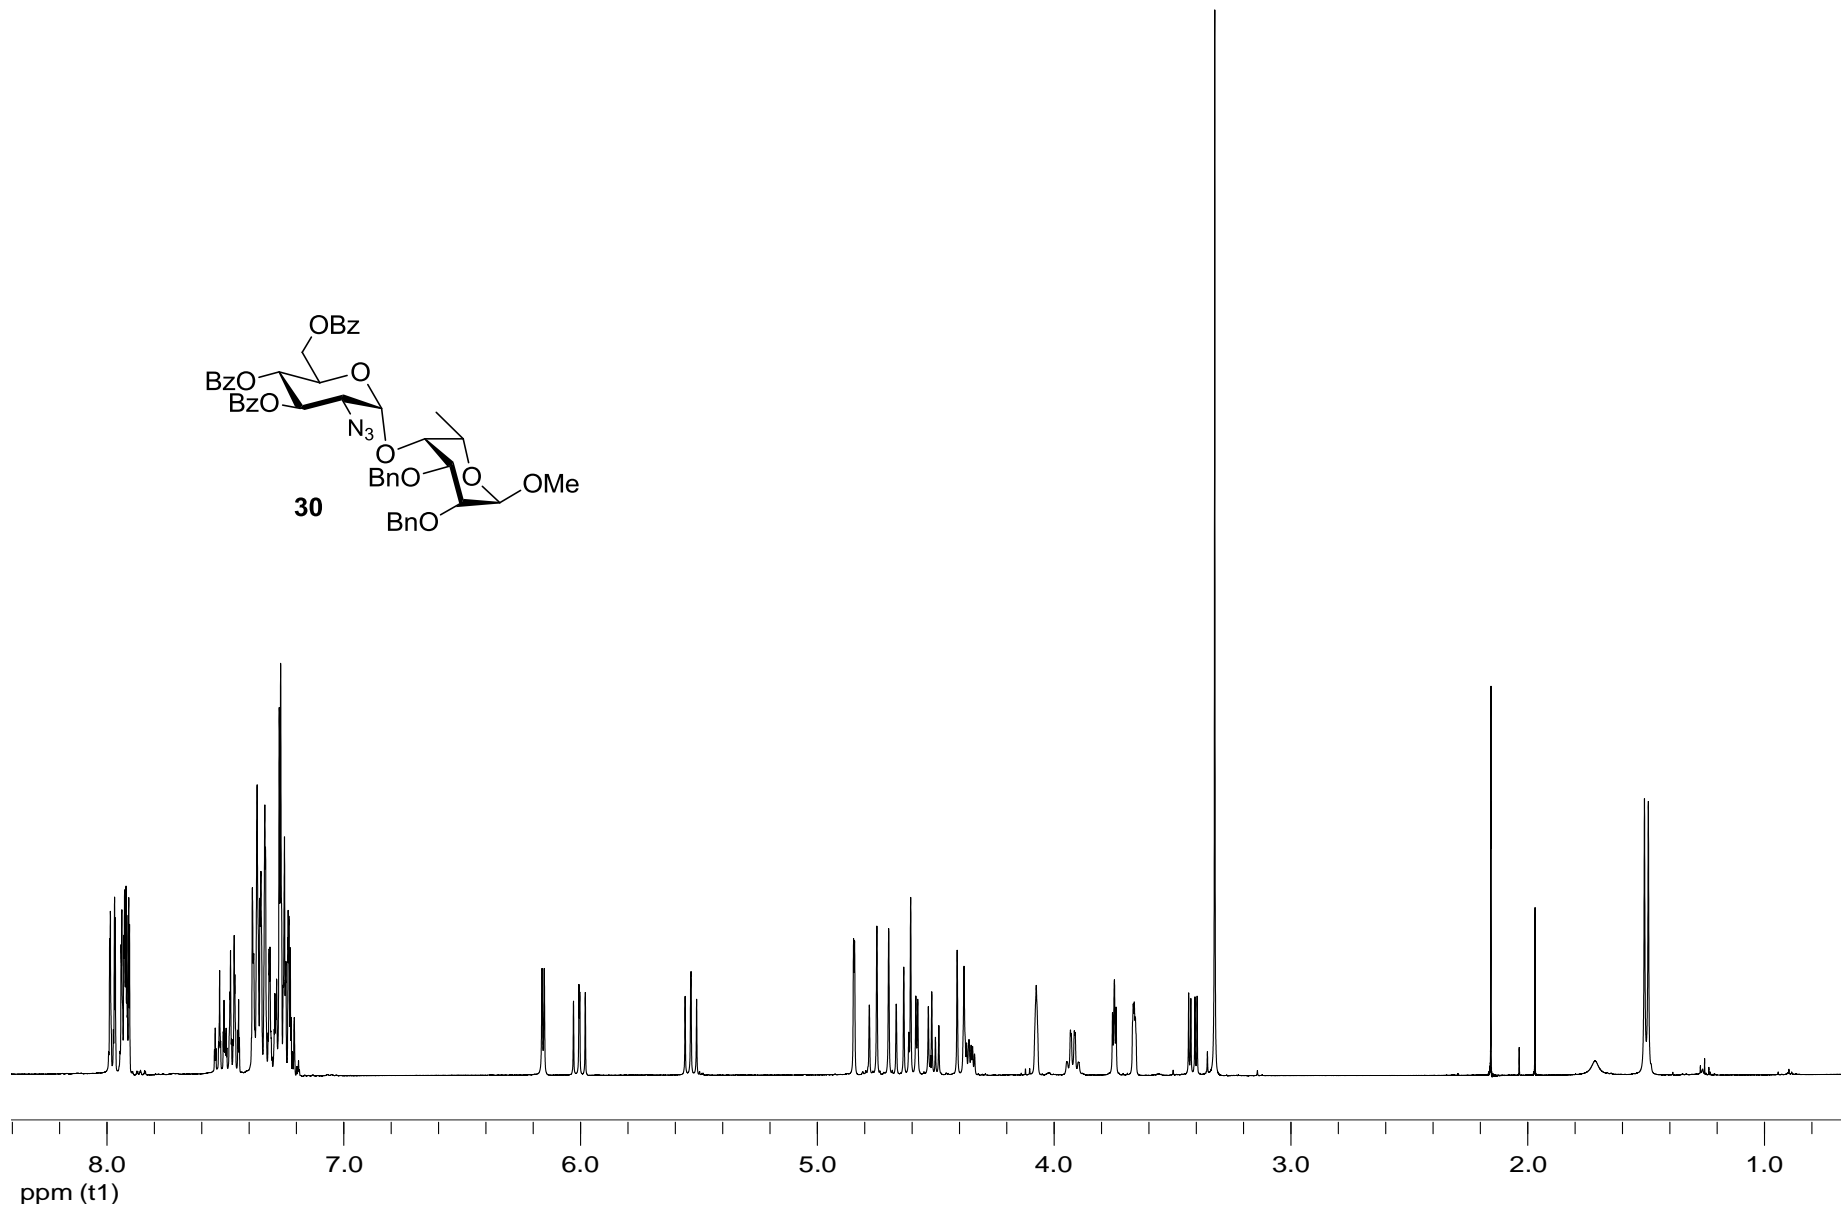

S13

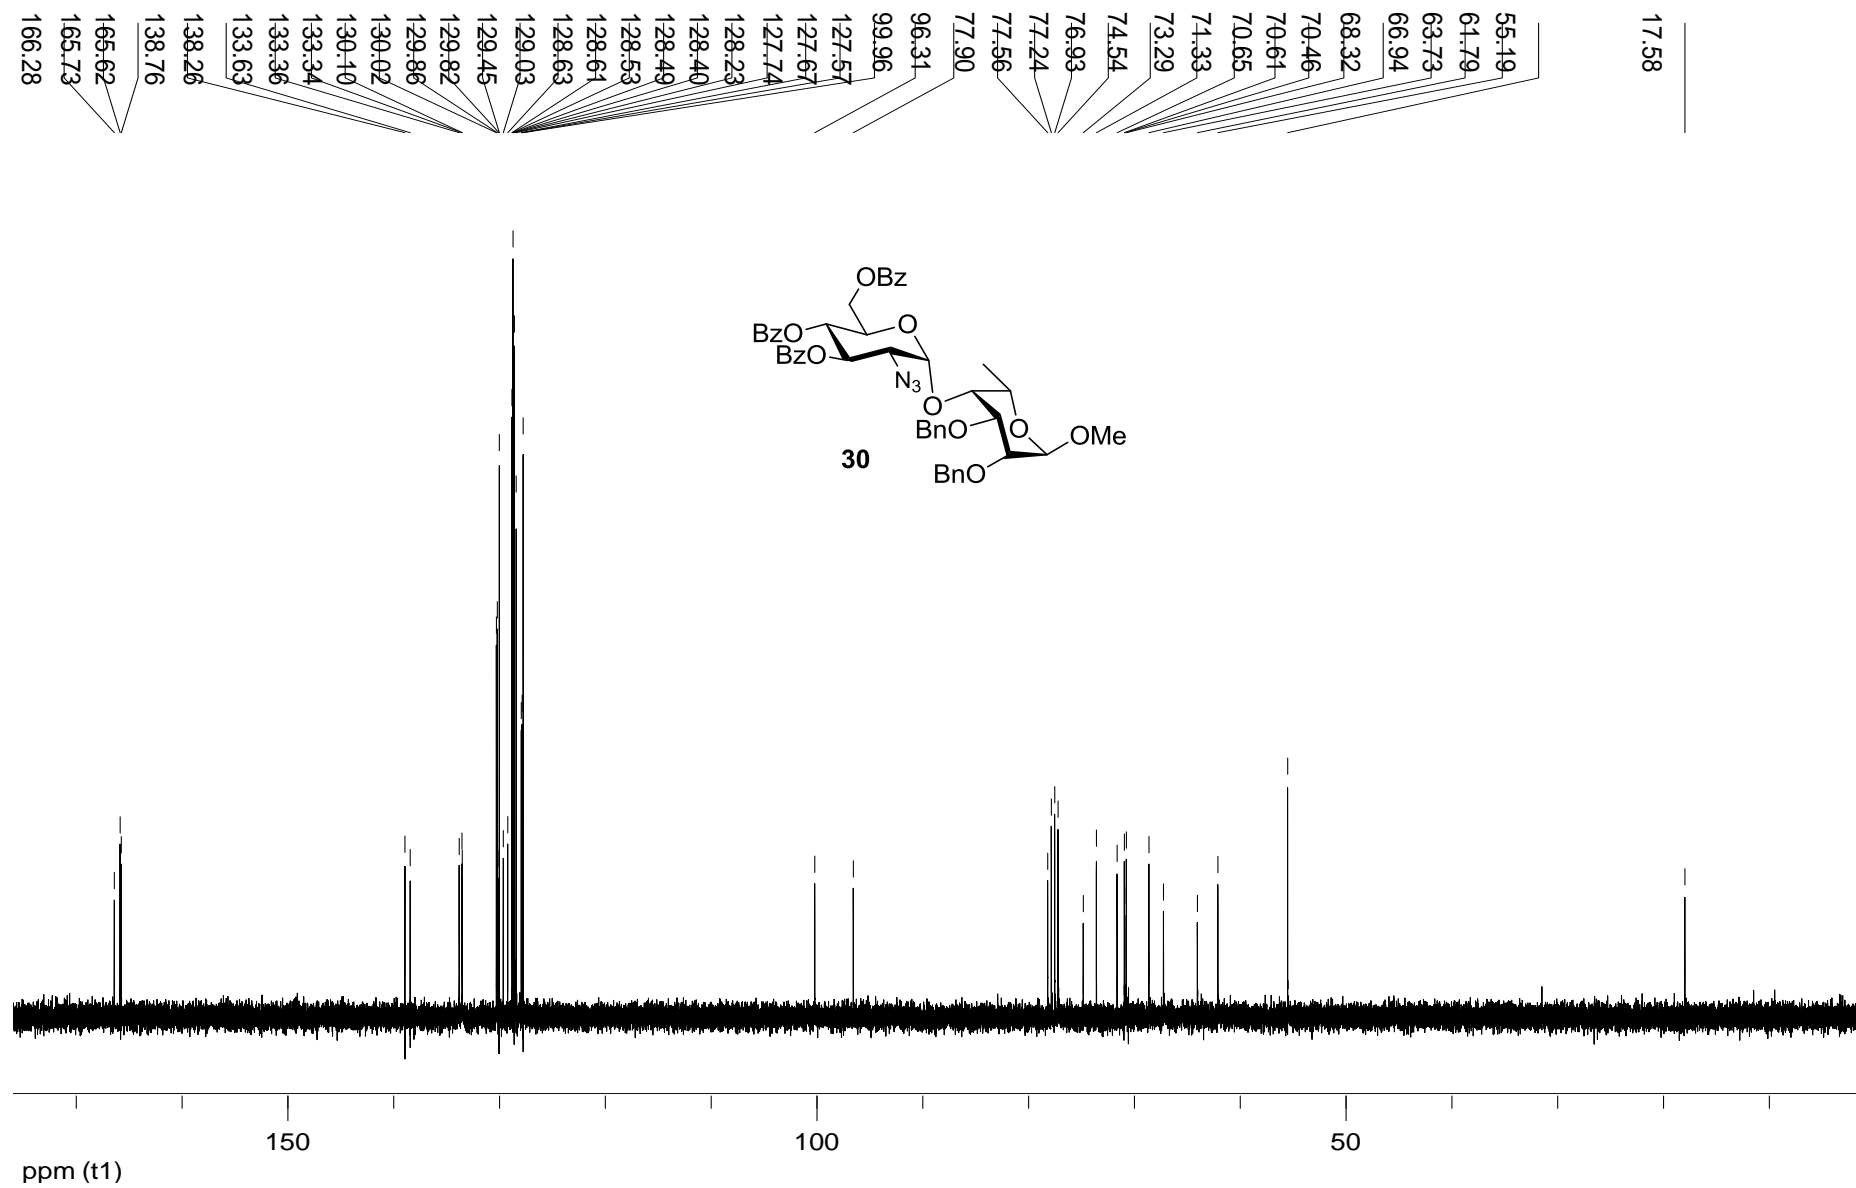

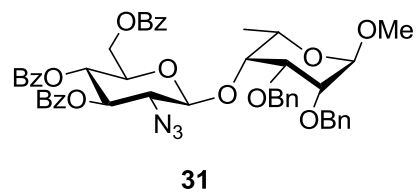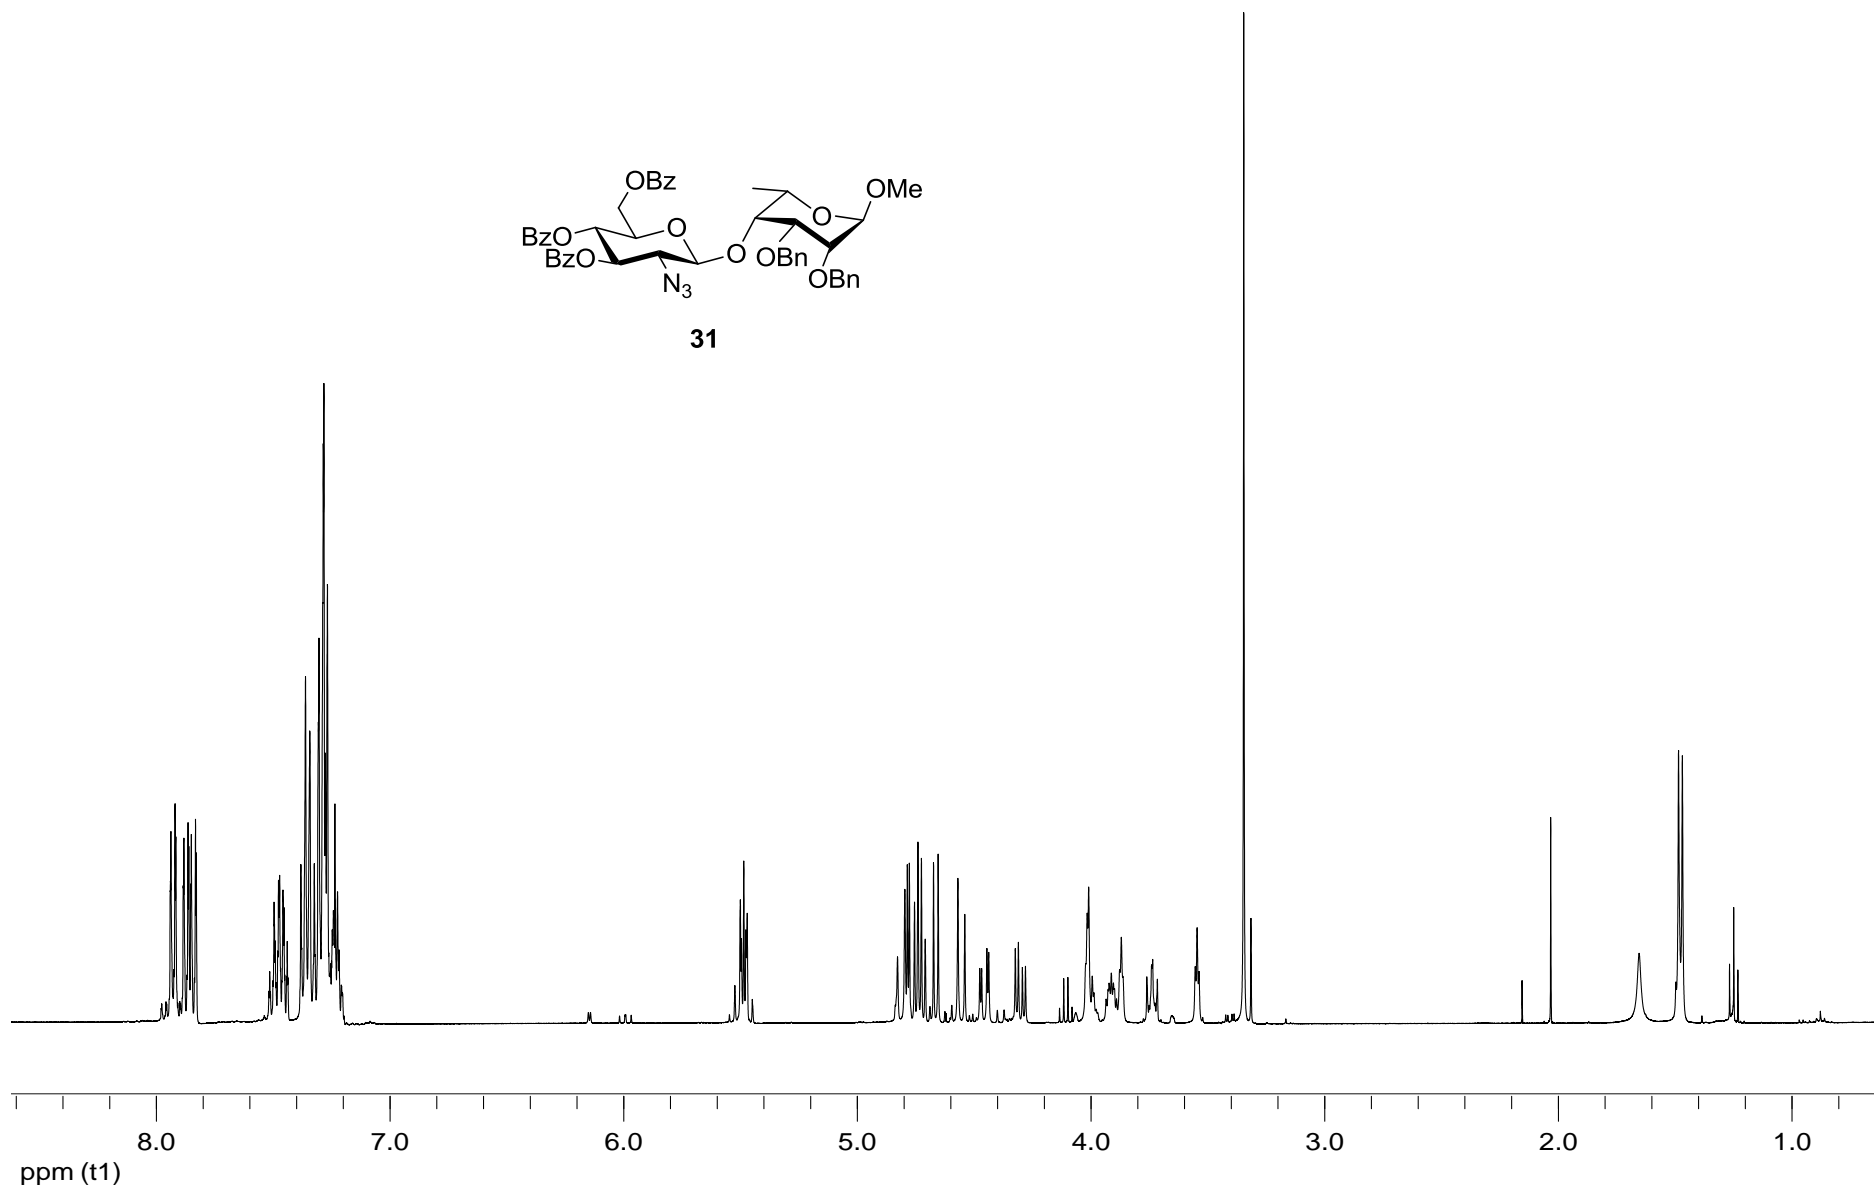

Supplement: molecules-17-09790-s001.pdf [file molecules-17-09790-s001.pdf]
